# Supplementary material
Source: PubMed Central journal article supplement (PMC6557654)
Supplement: jcsm.15.6.873s1.pdf [file jcsm.15.6.873s1.pdf]

| <b>Table S1. Mean number of prescriptions per person</b> |                         |                  |                              |                         |                  |                              |         |
|----------------------------------------------------------|-------------------------|------------------|------------------------------|-------------------------|------------------|------------------------------|---------|
|                                                          | <b>ADSM</b>             |                  |                              | <b>non-ADSM</b>         |                  |                              |         |
|                                                          | Number of prescriptions | Number of People | Mean of number Rx per person | Number of prescriptions | Number of People | Mean of number Rx per person | p-value |
| <b>2009</b>                                              | 233,522                 | 109,795          | 2.13                         | 941,975                 | 329,436          | 2.86                         | <0.0001 |
| <b>2010</b>                                              | 309,455                 | 124,245          | 2.49                         | 1,430,511               | 393,805          | 3.63                         | <0.0001 |
| <b>2011</b>                                              | 378,124                 | 138,513          | 2.73                         | 1,754,239               | 437,072          | 4.01                         | <0.0001 |
| <b>2012</b>                                              | 415,718                 | 143,492          | 2.90                         | 1,822,990               | 444,333          | 4.10                         | <0.0001 |
| <b>2013</b>                                              | 389,758                 | 128,074          | 3.04                         | 1,879,309               | 439,112          | 4.28                         | <0.0001 |
| <b>2014</b>                                              | 352,151                 | 114,906          | 3.06                         | 1,874,418               | 434,209          | 4.32                         | <0.0001 |
| <b>2015</b>                                              | 325,599                 | 107,039          | 3.04                         | 1,875,469               | 434,358          | 4.32                         | <0.0001 |

**Table S2. Characteristics of Treatment Episode by Beneficiary Categories**

|                                 | ADSM      |      |                     | Non-ADSM  |      |                     |
|---------------------------------|-----------|------|---------------------|-----------|------|---------------------|
|                                 | N         | %    | Duration (mean, sd) | N         | %    | Duration (mean, sd) |
| <b>Overall</b>                  | 1,023,237 | 100% | 69.5 (145.3)        | 3196618   | 100% | 142.8 (281.8)       |
| <b>By episode type</b>          |           |      |                     |           |      |                     |
| <i>Acute (&lt;30 days)</i>      | 310,742   | 30%  | 10.9 (6.4)          | 37,7804   | 12%  | 12.1 (7.4)          |
| <i>Intermittent (0-89 days)</i> | 518,006   | 51%  | 40.1 (16.4)         | 1,683,596 | 53%  | 39.3 (16.7)         |
| <i>Chronic (&gt;=90 days)</i>   | 194,489   | 19%  | 241.3 (270.1)       | 1135218   | 36%  | 339.8 (403.4)       |
| <b>Age group 18-24</b>          |           |      |                     |           |      |                     |
| <i>Acute (&lt;30 days)</i>      | 69754     | 32%  | 11.0 (6.5)          | 29919     | 22%  | 10.0 (7.2)          |
| <i>Intermittent (0-89 days)</i> | 110359    | 51%  | 41.0 (16.6)         | 74598     | 56%  | 39.4 (16.3)         |
| <i>Chronic (&gt;=90 days)</i>   | 36659     | 17%  | 182.8 (159.4)       | 29261     | 22%  | 232.2 (237.9)       |
| <b>Age group 25-34</b>          |           |      |                     |           |      |                     |
| <i>Acute (&lt;30 days)</i>      | 137726    | 33%  | 10.7 (6.3)          | 44366     | 17%  | 11.8 (7.1)          |
| <i>Intermittent (0-89 days)</i> | 207055    | 49%  | 40.3 (16.4)         | 143897    | 55%  | 40.0 (16.8)         |
| <i>Chronic (&gt;=90 days)</i>   | 77148     | 18%  | 228.4 (239.1)       | 71442     | 28%  | 283.6 (317.2)       |
| <b>Age group 35-44</b>          |           |      |                     |           |      |                     |
| <i>Acute (&lt;30 days)</i>      | 76947     | 27%  | 11.1 (6.3)          | 42931     | 13%  | 12.2 (7.1)          |
| <i>Intermittent (0-89 days)</i> | 145850    | 52%  | 39.6 (16.3)         | 181459    | 55%  | 39.5 (16.8)         |
| <i>Chronic (&gt;=90 days)</i>   | 58342     | 21%  | 274.7 (316.5)       | 103225    | 32%  | 333.3 (393.5)       |
| <b>Age group 45-64</b>          |           |      |                     |           |      |                     |
| <i>Acute (&lt;30 days)</i>      | 26289     | 25%  | 11.4 (6.4)          | 133,300   | 11%  | 12.0 (7.4)          |
| <i>Intermittent (0-89 days)</i> | 54645     | 53%  | 39.3 (16.3)         | 640,963   | 54%  | 39.1 (16.8)         |
| <i>Chronic (&gt;=90 days)</i>   | 22312     | 22%  | 294.7 (349.8)       | 423,066   | 35%  | 359.6 (431.3)       |

**Figure S1. Crude rates in sedative hypnotics in ADSM and non-ADSM 2009-2015**

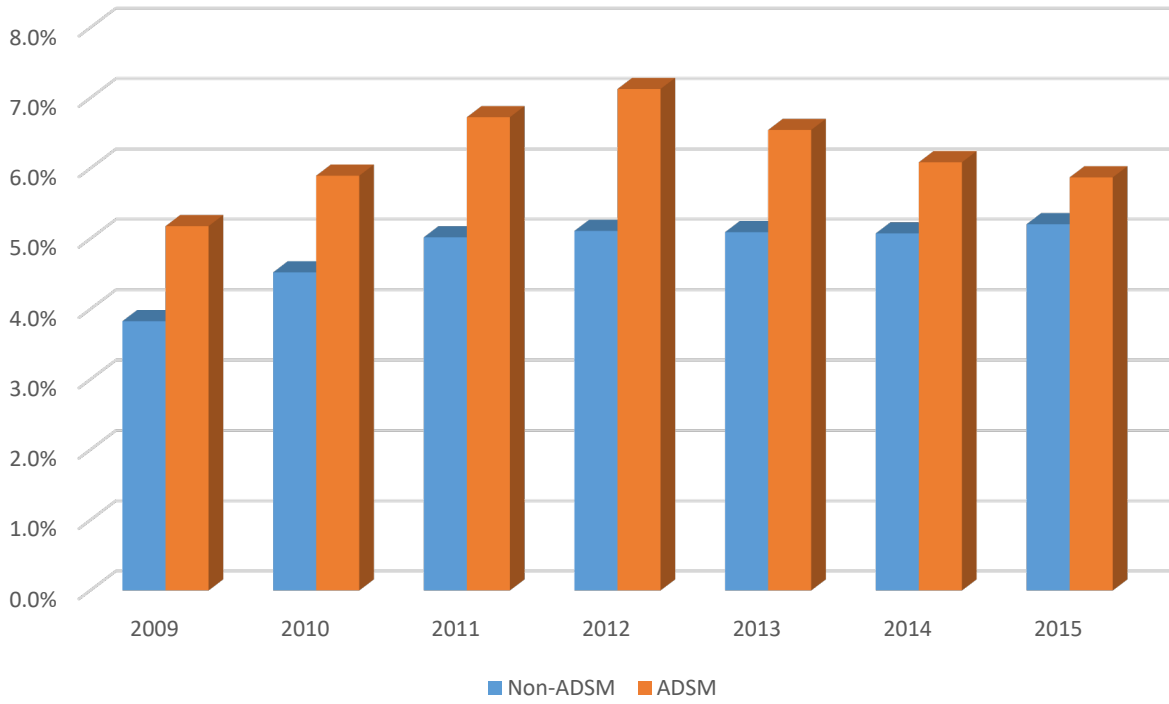

| <b>Table S3. Diagnostic codes for sleep related conditions</b> |                                                                          |                         |
|----------------------------------------------------------------|--------------------------------------------------------------------------|-------------------------|
| <b>ICD 9 &amp; ICD 10</b>                                      | <b>Description</b>                                                       | <b>Category</b>         |
| 30741                                                          | TRANSIENT DISORDER OF INITIATING OR MAINTAINING SLEEP                    | Insomnia                |
| 30742                                                          | PERSISTENT DISORDER OF INITIATING OR MAINTAINING SLEEP                   | Insomnia                |
| 3270                                                           | ORGANIC DISORDERS OF INITIATING AND MAINTAINING SLEEP [ORGANIC INSOMNIA] | Insomnia                |
| 32700                                                          | ORGANIC INSOMNIA, UNSPECIFIED                                            | Insomnia                |
| 32701                                                          | INSOMNIA DUE TO MEDICAL CONDITION CLASSIFIED ELSEWHERE                   | Insomnia                |
| 32702                                                          | INSOMNIA DUE TO MENTAL DISORDER                                          | Insomnia                |
| 32709                                                          | OTHER ORGANIC INSOMNIA                                                   | Insomnia                |
| 78051                                                          | INSOMNIA WITH SLEEP APNEA, UNSPECIFIED                                   | Insomnia                |
| 78052                                                          | INSOMNIA, UNSPECIFIED                                                    | Insomnia                |
| F5101                                                          | PRIMARY INSOMNIA                                                         | Insomnia                |
| F5102                                                          | ADJUSTMENT INSOMNIA                                                      | Insomnia                |
| F5103                                                          | PARADOXICAL INSOMNIA                                                     | Insomnia                |
| F5104                                                          | PSYCHOPHYSIOLOGIC INSOMNIA                                               | Insomnia                |
| F5105                                                          | INSOMNIA DUE TO OTHER MENTAL DISORDER                                    | Insomnia                |
| F5109                                                          | OTHER INSOMNIA NOT DUE TO A SUBSTANCE OR KNOWN PHYSIOLOGICAL CONDITION   | Insomnia                |
| G4701                                                          | INSOMNIA DUE TO MEDICAL CONDITION                                        | Insomnia                |
| G4709                                                          | OTHER INSOMNIA                                                           | Insomnia                |
| 3272                                                           | ORGANIC SLEEP APNEA                                                      | Obstructive sleep apnea |
| 32720                                                          | ORGANIC SLEEP APNEA, UNSPECIFIED                                         | Obstructive sleep apnea |
| 32721                                                          | PRIMARY CENTRAL SLEEP APNEA                                              | Obstructive sleep apnea |
| 32723                                                          | OBSTRUCTIVE SLEEP APNEA (ADULT)(PEDIATRIC)                               | Obstructive sleep apnea |
| 32727                                                          | CENTRAL SLEEP APNEA IN CONDITIONS CLASSIFIED ELSEWHERE                   | Obstructive sleep apnea |
| 32729                                                          | OTHER ORGANIC SLEEP APNEA                                                | Obstructive sleep apnea |
| 78053                                                          | HYPERSOMNIA WITH SLEEP APNEA, UNSPECIFIED                                | Obstructive sleep apnea |
| 78057                                                          | UNSPECIFIED SLEEP APNEA                                                  | Obstructive sleep apnea |

|       |                                                                    |                           |
|-------|--------------------------------------------------------------------|---------------------------|
| G4730 | SLEEP APNEA, UNSPECIFIED                                           | Obstructive sleep apnea   |
| G4731 | PRIMARY CENTRAL SLEEP APNEA                                        | Obstructive sleep apnea   |
| G4733 | OBSTRUCTIVE SLEEP APNEA (ADULT) (PEDIATRIC)                        | Obstructive sleep apnea   |
| G4737 | CENTRAL SLEEP APNEA IN CONDITIONS CLASSIFIED ELSEWHERE             | Obstructive sleep apnea   |
| G4739 | OTHER SLEEP APNEA                                                  | Obstructive sleep apnea   |
| 30745 | CIRCADIAN RHYTHM SLEEP DISORDER OF NONORGANIC ORIGIN               | Circadian rhythm disorder |
| 3273  | CIRCADIAN RHYTHM SLEEP DISORDER                                    | Circadian rhythm disorder |
| 32730 | CIRCADIAN RHYTHM SLEEP DISORDER, UNSPECIFIED                       | Circadian rhythm disorder |
| 32731 | CIRCADIAN RHYTHM SLEEP DISORDER, DELAYED SLEEP PHASE TYPE          | Circadian rhythm disorder |
| 32732 | CIRCADIAN RHYTHM SLEEP DISORDER, ADVANCED SLEEP PHASE TYPE         | Circadian rhythm disorder |
| 32733 | CIRCADIAN RHYTHM SLEEP DISORDER, IRREGULAR SLEEP-WAKE TYPE         | Circadian rhythm disorder |
| 32734 | CIRCADIAN RHYTHM SLEEP DISORDER, FREE-RUNNING TYPE                 | Circadian rhythm disorder |
| 32735 | CIRCADIAN RHYTHM SLEEP DISORDER, JET LAG TYPE                      | Circadian rhythm disorder |
| 32736 | CIRCADIAN RHYTHM SLEEP DISORDER, SHIFT WORK TYPE                   | Circadian rhythm disorder |
| 32737 | CIRCADIAN RHYTHM SLEEP DISORDER IN CONDITIONS CLASSIFIED ELSEWHERE | Circadian rhythm disorder |
| 32739 | OTHER CIRCADIAN RHYTHM SLEEP DISORDER                              | Circadian rhythm disorder |
| 78055 | DISRUPTION OF 24 HOUR SLEEP WAKE CYCLE, UNSPECIFIED                | Circadian rhythm disorder |
| G4720 | CIRCADIAN RHYTHM SLEEP DISORDER, UNSPECIFIED TYPE                  | Circadian rhythm disorder |
| G4721 | CIRCADIAN RHYTHM SLEEP DISORDER, DELAYED SLEEP PHASE TYPE          | Circadian rhythm disorder |
| G4722 | CIRCADIAN RHYTHM SLEEP DISORDER, ADVANCED SLEEP PHASE TYPE         | Circadian rhythm disorder |
| G4723 | CIRCADIAN RHYTHM SLEEP DISORDER, IRREGULAR SLEEP WAKE TYPE         | Circadian rhythm disorder |
| G4724 | CIRCADIAN RHYTHM SLEEP DISORDER, FREE RUNNING TYPE                 | Circadian rhythm disorder |
| G4725 | CIRCADIAN RHYTHM SLEEP DISORDER, JET LAG TYPE                      | Circadian rhythm disorder |
| G4726 | CIRCADIAN RHYTHM SLEEP DISORDER, SHIFT WORK TYPE                   | Circadian rhythm disorder |

|       |                                                                              |                           |
|-------|------------------------------------------------------------------------------|---------------------------|
| G4727 | CIRCADIAN RHYTHM SLEEP DISORDER IN CONDITIONS CLASSIFIED ELSEWHERE           | Circadian rhythm disorder |
| G4729 | OTHER CIRCADIAN RHYTHM SLEEP DISORDER                                        | Circadian rhythm disorder |
| 29182 | ALCOHOL INDUCED SLEEP DISORDERS                                              | Others                    |
| 29285 | DRUG INDUCED SLEEP DISORDERS                                                 | Others                    |
| 3074  | SPECIFIC DISORDERS OF SLEEP OF NONORGANIC ORIGIN                             | Others                    |
| 30740 | NONORGANIC SLEEP DISORDER, UNSPECIFIED                                       | Others                    |
| 30743 | TRANSIENT DISORDER OF INITIATING OR MAINTAINING WAKEFULNESS                  | Others                    |
| 30744 | PERSISTENT DISORDER OF INITIATING OR MAINTAINING WAKEFULNESS                 | Others                    |
| 30746 | SLEEP AROUSAL DISORDER                                                       | Others                    |
| 30747 | OTHER DYSFUNCTIONS OF SLEEP STAGES OR AROUSAL FROM SLEEP                     | Others                    |
| 30748 | REPETITIVE INTRUSIONS OF SLEEP                                               | Others                    |
| 30749 | OTHER SPECIFIC DISORDERS OF SLEEP OF NONORGANIC ORIGIN                       | Others                    |
| 3271  | ORGANIC DISORDER OF EXCESSIVE SOMNOLENCE [ORGANIC HYPERSOMNIA]               | Others                    |
| 32710 | ORGANIC HYPERSOMNIA, UNSPECIFIED                                             | Others                    |
| 32711 | IDIOPATHIC HYPERSOMNIA WITH LONG SLEEP TIME                                  | Others                    |
| 32712 | IDIOPATHIC HYPERSOMNIA WITHOUT LONG SLEEP TIME                               | Others                    |
| 32713 | RECURRENT HYPERSOMNIA                                                        | Others                    |
| 32714 | HYPERSOMNIA DUE TO MEDICAL CONDITION CLASSIFIED ELSEWHERE                    | Others                    |
| 32715 | HYPERSOMNIA DUE TO MENTAL DISORDER                                           | Others                    |
| 32719 | OTHER ORGANIC HYPERSOMNIA                                                    | Others                    |
| 32722 | HIGH ALTITUDE PERIODIC BREATHING                                             | Others                    |
| 32724 | IDIOPATHIC SLEEP RELATED NON-OBSTRUCTIVE ALVEOLAR HYPOVENTILATION            | Others                    |
| 32725 | CONGENITAL CENTRAL ALVEOLAR HYPOVENTILATION SYNDROME                         | Others                    |
| 32726 | SLEEP RELATED HYPOVENTILATION/HYPOXEMIA IN CONDITIONS CLASSIFIABLE ELSEWHERE | Others                    |
| 3274  | ORGANIC PARASOMNIA                                                           | Others                    |
| 32740 | ORGANIC PARASOMNIA, UNSPECIFIED                                              | Others                    |

|        |                                                                                                          |        |
|--------|----------------------------------------------------------------------------------------------------------|--------|
| 32741  | CONFUSIONAL AROUSALS                                                                                     | Others |
| 32742  | REM SLEEP BEHAVIOR DISORDER                                                                              | Others |
| 32743  | RECURRENT ISOLATED SLEEP PARALYSIS                                                                       | Others |
| 32744  | PARASOMNIA IN CONDITIONS CLASSIFIED ELSEWHERE                                                            | Others |
| 32749  | OTHER ORGANIC PARASOMNIA                                                                                 | Others |
| 3275   | ORGANIC SLEEP RELATED MOVEMENT DISORDERS                                                                 | Others |
| 32751  | PERIODIC LIMB MOVEMENT DISORDER                                                                          | Others |
| 32752  | SLEEP RELATED LEG CRAMPS                                                                                 | Others |
| 32753  | SLEEP RELATED BRUXISM                                                                                    | Others |
| 32759  | OTHER ORGANIC SLEEP RELATED MOVEMENT DISORDERS                                                           | Others |
| 3278   | OTHER ORGANIC SLEEP DISORDERS                                                                            | Others |
| 7805   | SLEEP DISTURBANCES                                                                                       | Others |
| 78050  | SLEEP DISTURBANCE, UNSPECIFIED                                                                           | Others |
| 78054  | HYPERSOMNIA, UNSPECIFIED                                                                                 | Others |
| 78056  | DYSFUNCTIONS ASSOCIATED WITH SLEEP STAGES OR AROUSAL FROM SLEEP                                          | Others |
| 78058  | SLEEP RELATED MOVEMENT DISORDER, UNSPECIFIED                                                             | Others |
| 78059  | OTHER SLEEP DISTURBANCES                                                                                 | Others |
| F10182 | ALCOHOL ABUSE WITH ALCOHOL-INDUCED SLEEP DISORDER                                                        | Others |
| F10282 | ALCOHOL DEPENDENCE WITH ALCOHOL-INDUCED SLEEP DISORDER                                                   | Others |
| F10982 | ALCOHOL USE, UNSPECIFIED WITH ALCOHOL-INDUCED SLEEP DISORDER                                             | Others |
| F11182 | OPIOID ABUSE WITH OPIOID-INDUCED SLEEP DISORDER                                                          | Others |
| F11282 | OPIOID DEPENDENCE WITH OPIOID-INDUCED SLEEP DISORDER                                                     | Others |
| F11982 | OPIOID USE, UNSPECIFIED WITH OPIOID-INDUCED SLEEP DISORDER                                               | Others |
| F13182 | SEDATIVE, HYPNOTIC OR ANXIOLYTIC ABUSE WITH SEDATIVE, HYPNOTIC OR ANXIOLYTIC-INDUCED SLEEP DISORDER      | Others |
| F13282 | SEDATIVE, HYPNOTIC OR ANXIOLYTIC DEPENDENCE WITH SEDATIVE, HYPNOTIC OR ANXIOLYTIC-INDUCED SLEEP DISORDER | Others |
| F13982 | SEDATIVE, HYPNOTIC OR ANXIOLYTIC USE, UNSPECIFIED WITH SEDATIVE,                                         | Others |

|        |                                                                                                  |        |
|--------|--------------------------------------------------------------------------------------------------|--------|
|        | HYPNOTIC OR ANXIOLYTIC-INDUCED SLEEP DISORDER                                                    |        |
| F14182 | COCAINE ABUSE WITH COCAINE-INDUCED SLEEP DISORDER                                                | Others |
| F14282 | COCAINE DEPENDENCE WITH COCAINE-INDUCED SLEEP DISORDER                                           | Others |
| F14982 | COCAINE USE, UNSPECIFIED WITH COCAINE-INDUCED SLEEP DISORDER                                     | Others |
| F15182 | OTHER STIMULANT ABUSE WITH STIMULANT-INDUCED SLEEP DISORDER                                      | Others |
| F15282 | OTHER STIMULANT DEPENDENCE WITH STIMULANT-INDUCED SLEEP DISORDER                                 | Others |
| F15982 | OTHER STIMULANT USE, UNSPECIFIED WITH STIMULANT-INDUCED SLEEP DISORDER                           | Others |
| F19182 | OTHER PSYCHOACTIVE SUBSTANCE ABUSE WITH PSYCHOACTIVE SUBSTANCE-INDUCED SLEEP DISORDER            | Others |
| F19282 | OTHER PSYCHOACTIVE SUBSTANCE DEPENDENCE WITH PSYCHOACTIVE SUBSTANCE-INDUCED SLEEP DISORDER       | Others |
| F19982 | OTHER PSYCHOACTIVE SUBSTANCE USE, UNSPECIFIED WITH PSYCHOACTIVE SUBSTANCE-INDUCED SLEEP DISORDER | Others |
| F5111  | PRIMARY HYPERSOMNIA                                                                              | Others |
| F5112  | INSUFFICIENT SLEEP SYNDROME                                                                      | Others |
| F5113  | HYPERSOMNIA DUE TO OTHER MENTAL DISORDER                                                         | Others |
| F5119  | OTHER HYPERSOMNIA NOT DUE TO A SUBSTANCE OR KNOWN PHYSIOLOGICAL CONDITION                        | Others |
| F513   | SLEEPWALKING [SOMNAMBULISM]                                                                      | Others |
| F518   | OTHER SLEEP DISORDERS NOT DUE TO A SUBSTANCE OR KNOWN PHYSIOLOGICAL CONDITION                    | Others |
| F519   | SLEEP DISORDER NOT DUE TO A SUBSTANCE OR KNOWN PHYSIOLOGICAL CONDITION, UNSPECIFIED              | Others |
| G4710  | HYPERSOMNIA, UNSPECIFIED                                                                         | Others |
| G4711  | IDIOPATHIC HYPERSOMNIA WITH LONG SLEEP TIME                                                      | Others |



|       |                                                                  |        |
|-------|------------------------------------------------------------------|--------|
| G4712 | IDIOPATHIC HYPERSOMNIA WITHOUT LONG SLEEP TIME                   | Others |
| G4713 | RECURRENT HYPERSOMNIA                                            | Others |
| G4714 | HYPERSOMNIA DUE TO MEDICAL CONDITION                             | Others |
| G4719 | OTHER HYPERSOMNIA                                                | Others |
| G4732 | HIGH ALTITUDE PERIODIC BREATHING                                 | Others |
| G4734 | IDIOPATHIC SLEEP RELATED NONOBSTRUCTIVE ALVEOLAR HYPOVENTILATION | Others |
| G4735 | CONGENITAL CENTRAL ALVEOLAR HYPOVENTILATION SYNDROME             | Others |
| G4736 | SLEEP RELATED HYPOVENTILATION IN CONDITIONS CLASSIFIED ELSEWHERE | Others |
| G4750 | PARASOMNIA, UNSPECIFIED                                          | Others |
| G4751 | CONFUSIONAL AROUSALS                                             | Others |
| G4752 | REM SLEEP BEHAVIOR DISORDER                                      | Others |
| G4753 | RECURRENT ISOLATED SLEEP PARALYSIS                               | Others |
| G4754 | PARASOMNIA IN CONDITIONS CLASSIFIED ELSEWHERE                    | Others |
| G4759 | OTHER PARASOMNIA                                                 | Others |
| G4761 | PERIODIC LIMB MOVEMENT DISORDER                                  | Others |
| G4762 | SLEEP RELATED LEG CRAMPS                                         | Others |
| G4763 | SLEEP RELATED BRUXISM                                            | Others |
| G4769 | OTHER SLEEP RELATED MOVEMENT DISORDERS                           | Others |
|       |                                                                  |        |
|       |                                                                  |        |
|       |                                                                  |        |
